# Supplementary material for: The role of charge transfer in the oxidation state change of Ce atoms in the TM13–CeO2(111) systems (TM = Pd, Ag, Pt, Au): a DFT + U investigation
Source: Royal Society of Chemistry journal article supplement (doi:10.1039/c4cp06016d), 2015-01-01
Supplement: c4cp06016d1.pdf [file c4cp06016d1.pdf]

# Supporting Information: The Role of Charge Transfer in the Oxidation State Change of Ce Atoms in the $\text{TM}_{13}/\text{CeO}_2(111)$ systems (TM = Pd, Ag, Pt, Au): A DFT+ $U$ Investigation

Polina Tereshchuk,<sup>†</sup> Rafael L. H. Freire,<sup>‡</sup> Crina G. Ungureanu, Yohanna Seminovski,<sup>†</sup> Adam Kiejna,<sup>\*,§</sup> and Juarez L. F. Da Silva<sup>\*,†</sup>

*São Carlos Institute of Chemistry, University of São Paulo, PO Box 780, 13560-970, São Carlos, SP, Brazil, São Carlos Institute of Physics, University of São Paulo, PO Box 369, 13560-970, São Carlos, SP, Brazil, and Institute of Experimental Physics, University of Wrocław, plac M. Borna 9, PL-50-204 Wrocław, Poland*

E-mail: kiejna@ifd.uni.wroc.pl; juarez.dasilva@iqsc.usp.br  
Phone: +55 16 3373 6641. Fax: +55 16 3373 9952

---

\*To whom correspondence should be addressed

<sup>†</sup>University of São Paulo

<sup>‡</sup>University of São Paulo

<sup>§</sup>University of Wrocław

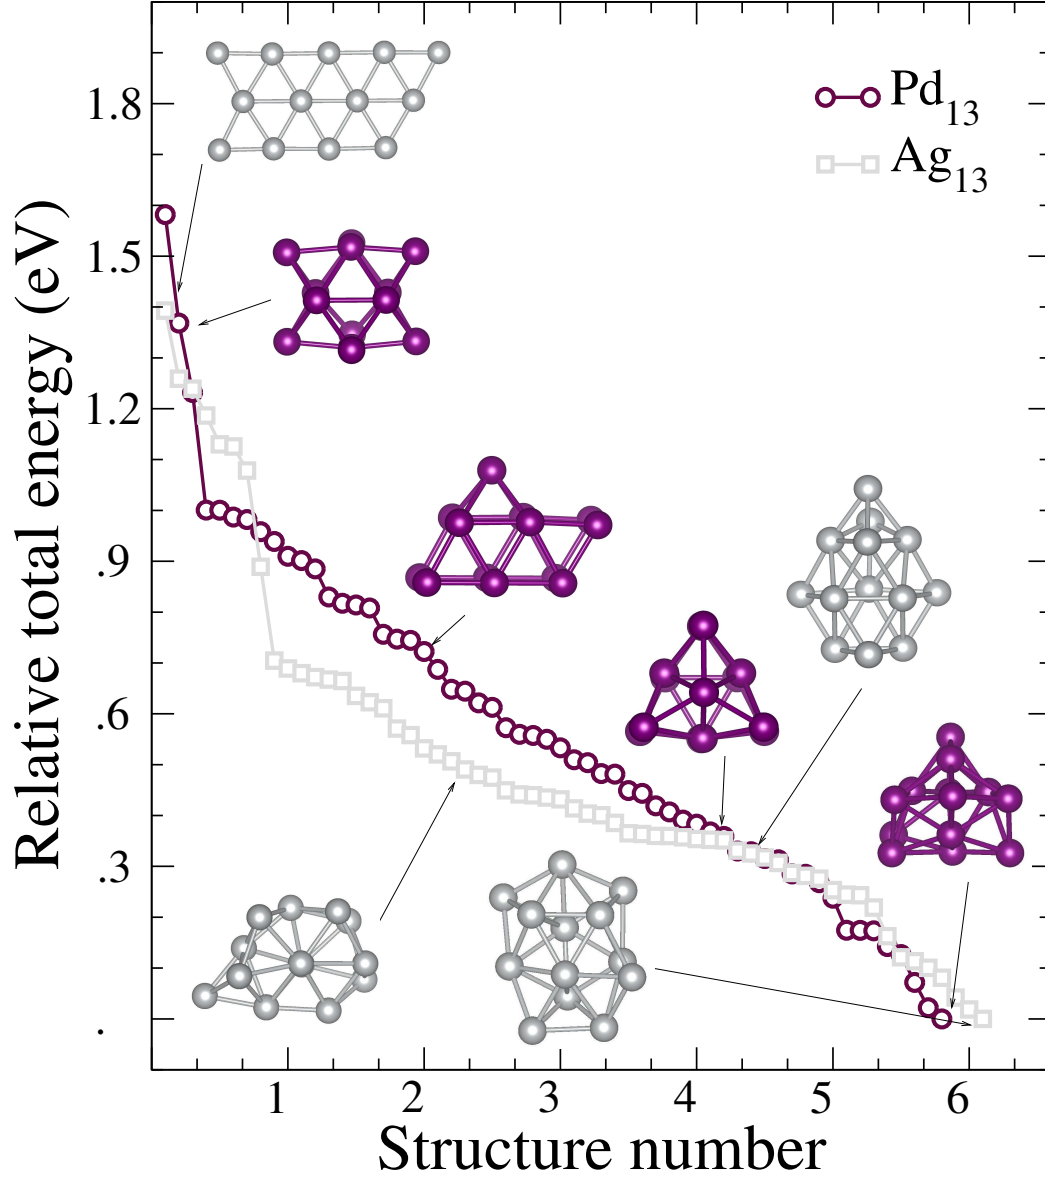

Figure 1: Relative total energy calculated for all the 13-atom Pd<sub>13</sub> and Ag<sub>13</sub> configurations.  $\Delta E_{\text{tot}} = E_{\text{tot}}^{\text{Config-i}} - E_{\text{tot}}^{\text{lowest}}$ , where  $E_{\text{tot}}^{\text{Config-i}}$  is the total energy of a given configuration and  $E_{\text{tot}}^{\text{lowest}}$  is the total energy of the lowest energy configuration. Representative atomic structures are also indicated within the figure.

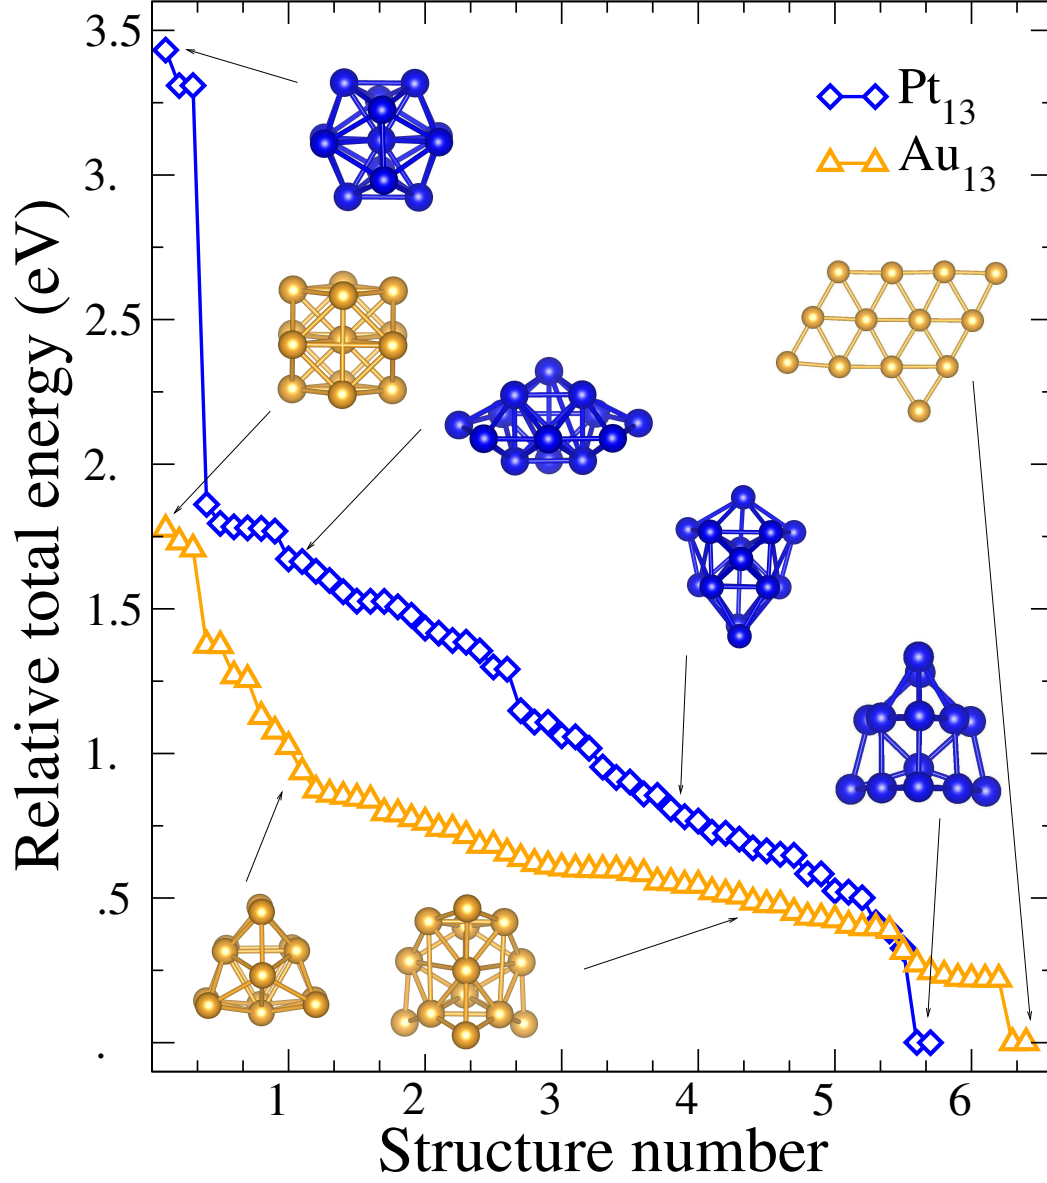

Figure 2: Relative total energy calculated for all the 13-atom Pt<sub>13</sub> and Au<sub>13</sub> configurations.  $\Delta E_{\text{tot}} = E_{\text{tot}}^{\text{Config-i}} - E_{\text{tot}}^{\text{lowest}}$ , where  $E_{\text{tot}}^{\text{Config-i}}$  is the total energy of a given configuration and  $E_{\text{tot}}^{\text{lowest}}$  is the total energy of the lowest energy configuration. Representative atomic structures are also indicated within the figure.

Pd

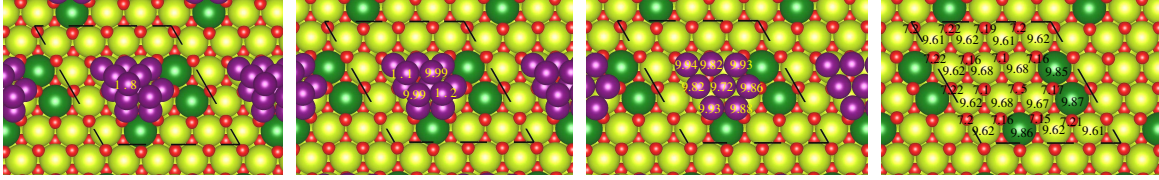

Ag

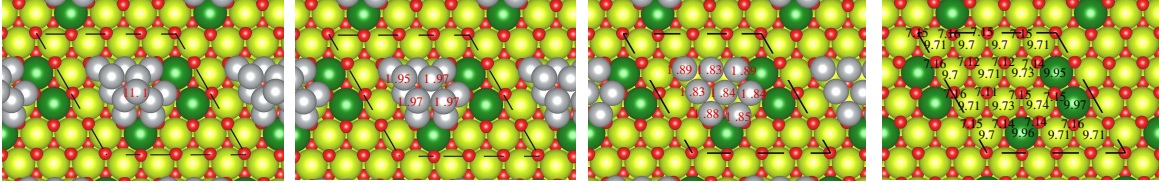

Pt

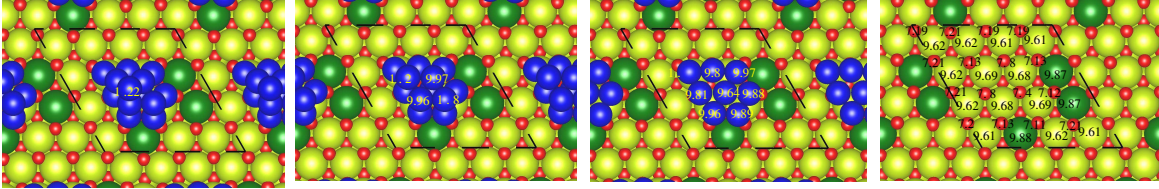

Au

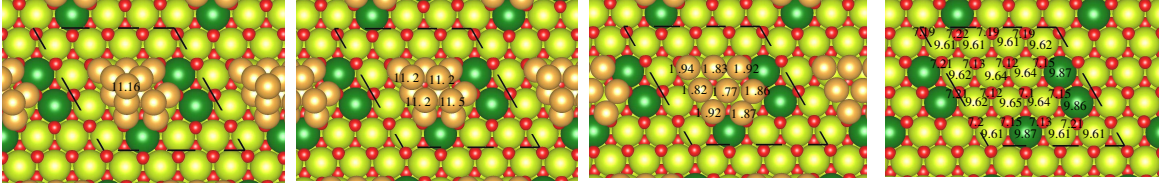

Figure 3: Layer resolved mapping of the Bader charges on the TM,  $\text{Ce}^{\text{III}}$ ,  $\text{Ce}^{\text{IV}}$ , and O atoms in the lowest energy configuration for the  $\text{TM}_{13}/\text{CeO}_2(111)$  systems (TM = Pd, Ag, Pt, Au). For the TM atoms, the Bader charges are indicated for every TM atom in the top, middle, and bottom layer in the 13-atom clusters. For the  $\text{Ce}^{\text{III}}$ ,  $\text{Ce}^{\text{IV}}$ , and O atoms, the Bader charges were calculated only for the tomost Ce and O layers in the  $\text{TM}_{13}/\text{CeO}_2(111)$  system. The O, TM, and Ce atoms are indicated by small (red), medium (purple (Pd), gray (Ag), blue (Pt), and yellow-orange (Au)), and large spheres. The Ce atoms are separated into two groups, namely,  $\text{Ce}^{\text{III}}$  (dark green) and  $\text{Ce}^{\text{IV}}$  (light green).

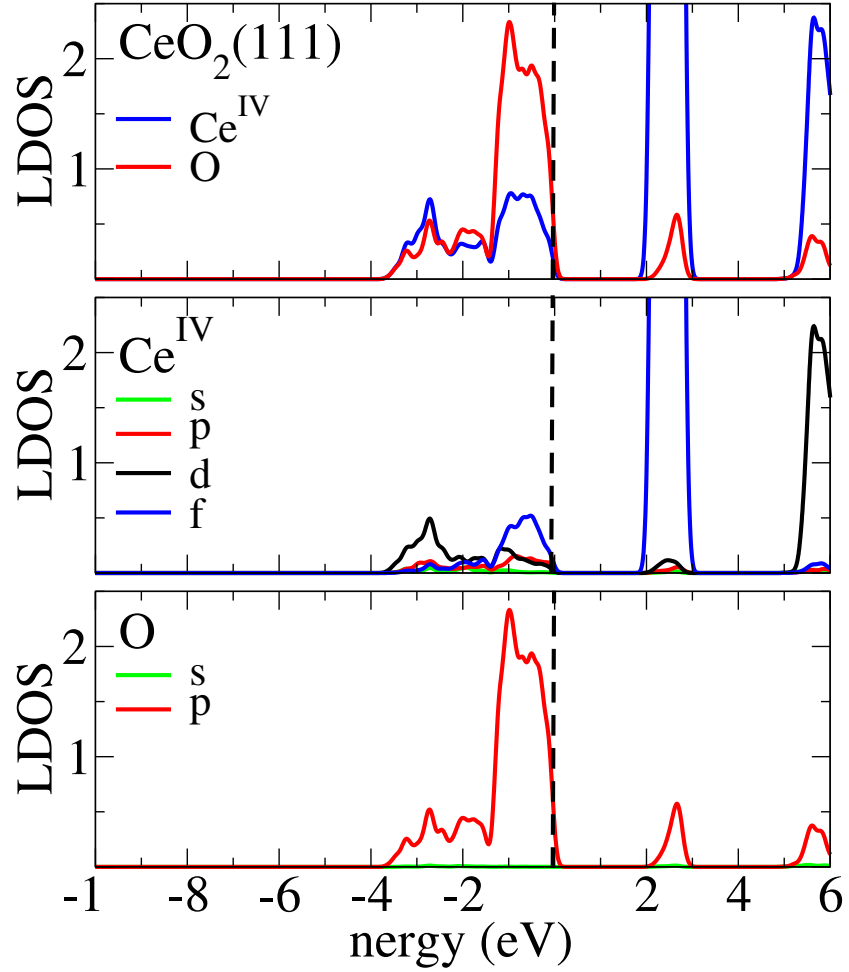

Figure 4: Atom resolved average local density of states (LDOS) of the  $\text{Ce}^{\text{IV}}$  and O atoms in the clean  $\text{CeO}_2(111)$  surface in the lowest energy configuration. The  $\text{Ce}^{\text{IV}}$  and O LDOS are the average over only the  $\text{Ce}^{\text{IV}}$  and O atoms in the topmost Ce and O layers in the clean  $\text{CeO}_2(111)$  surface. The decomposition of the LDOS into  $s$ -,  $p$ -,  $d$ -, and  $f$ -states are also shown for the respective atoms. The vertical dashed lines in black indicate the Fermi energy.

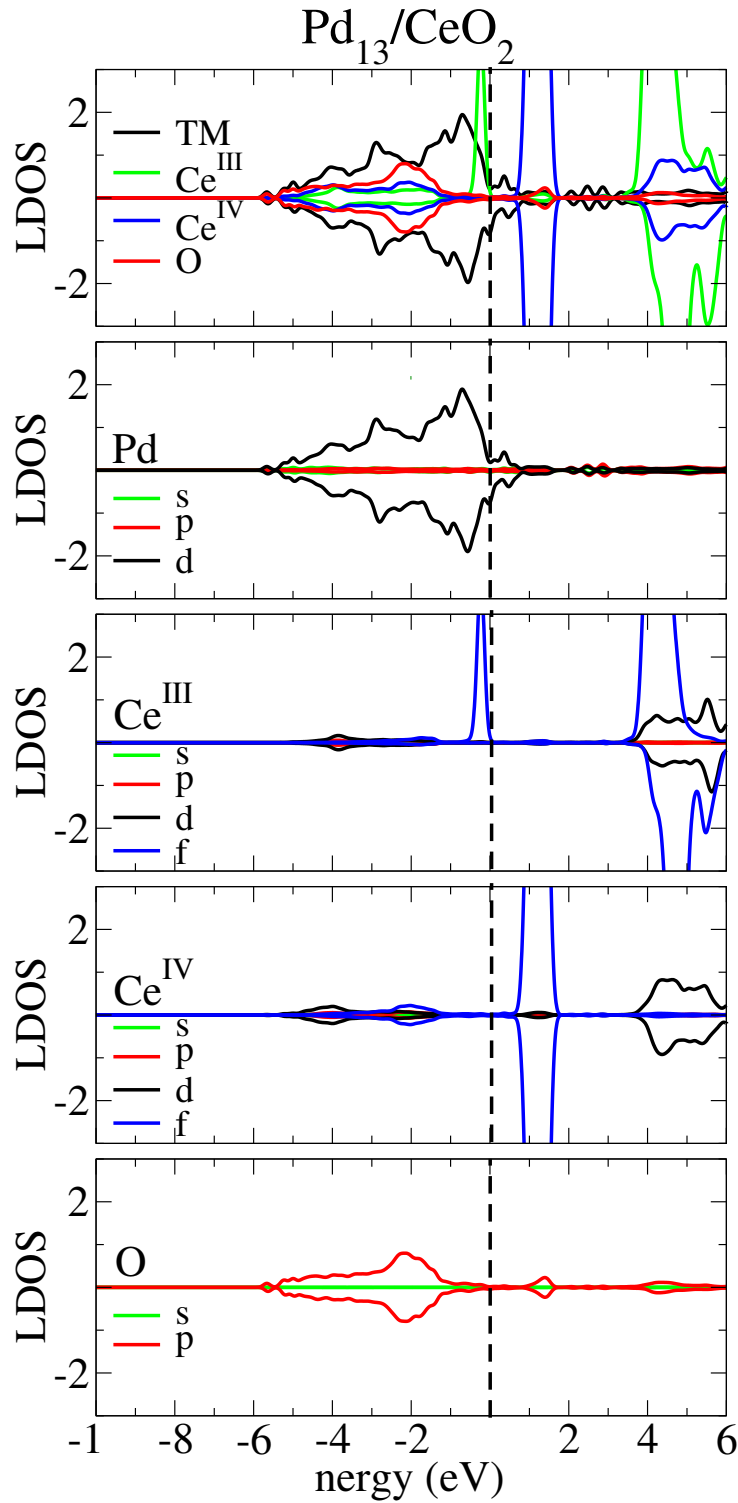

Figure 5: Atom resolved average local density of states (LDOS) of the Pd, Ce<sup>III</sup>, Ce<sup>IV</sup>, and O atoms in the Pd<sub>13</sub>/CeO<sub>2</sub>(111) system in the lowest energy configuration. The Pd LDOS is the average over all the Pd atoms in the 13-atom cluster, while the Ce<sup>III</sup>, Ce<sup>IV</sup>, and O LDOS are the average over only the Ce<sup>III</sup>, Ce<sup>IV</sup>, and O atoms in the topmost Ce and O layers in the CeO<sub>2</sub>(111) surface. The decomposition of the LDOS into *s*-, *p*-, *d*-, and *f*-states are also shown for the respective atoms. The vertical dashed lines in black indicate the Fermi energy.

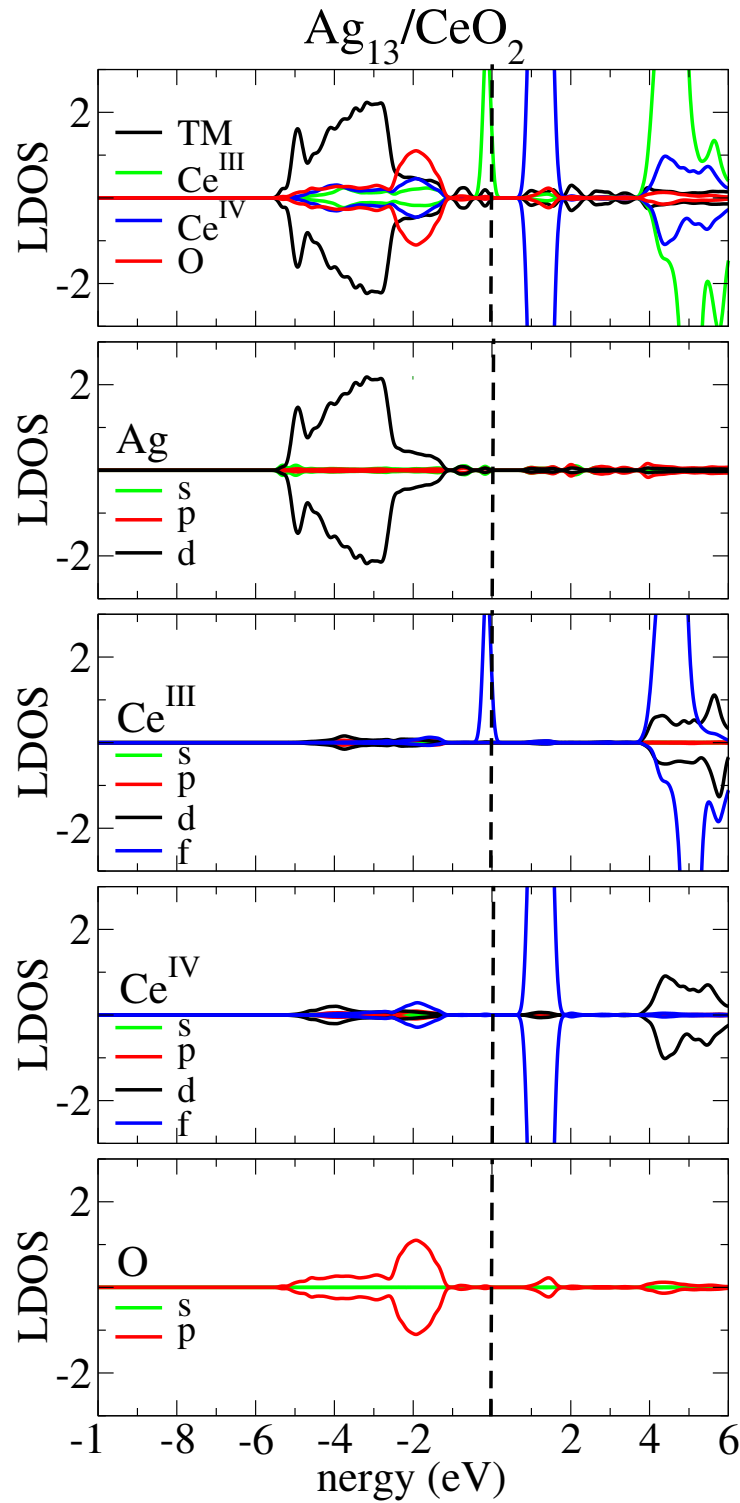

Figure 6: Atom resolved average local density of states (LDOS) of the Ag,  $\text{Ce}^{\text{III}}$ ,  $\text{Ce}^{\text{IV}}$ , and O atoms in the  $\text{Ag}_{13}/\text{CeO}_2(111)$  system in the lowest energy configuration. The Ag LDOS is the average over all the Ag atoms in the 13-atom cluster, while the  $\text{Ce}^{\text{III}}$ ,  $\text{Ce}^{\text{IV}}$ , and O LDOS are the average over only the  $\text{Ce}^{\text{III}}$ ,  $\text{Ce}^{\text{IV}}$ , and O atoms in the topmost Ce and O layers in the  $\text{CeO}_2(111)$  surface. The decomposition of the LDOS into  $s$ -,  $p$ -,  $d$ -, and  $f$ -states are also shown for the respective atoms. The vertical dashed lines in black indicate the Fermi energy.

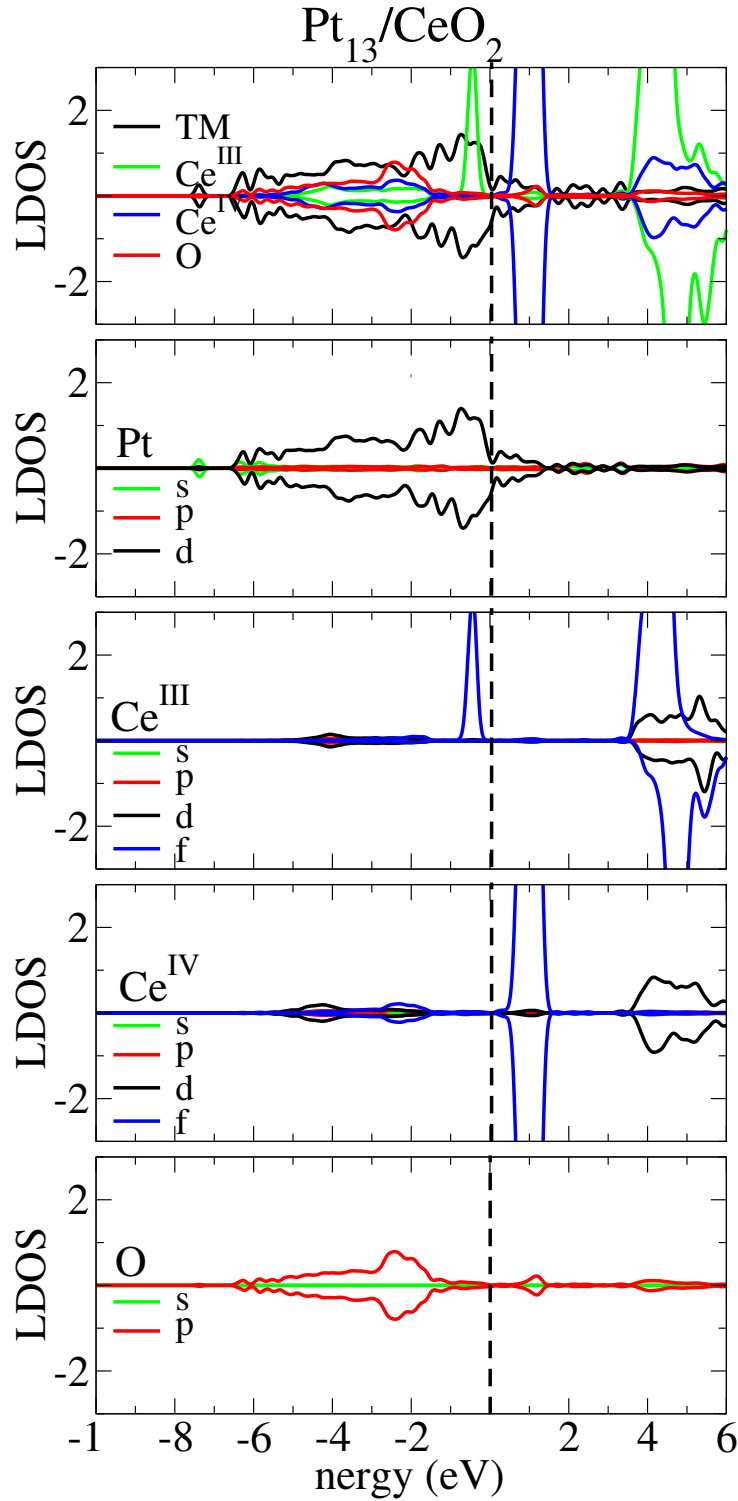

Figure 7: Atom resolved average local density of states (LDOS) of the Pt, Ce<sup>III</sup>, Ce<sup>IV</sup>, and O atoms in the Pt<sub>13</sub>/CeO<sub>2</sub>(111) system in the lowest energy configuration. The Pt LDOS is the average over all the Pt atoms in the 13-atom cluster, while the Ce<sup>III</sup>, Ce<sup>IV</sup>, and O LDOS are the average over only the Ce<sup>III</sup>, Ce<sup>IV</sup>, and O atoms in the topmost Ce and O layers in the CeO<sub>2</sub>(111) surface. The decomposition of the LDOS into *s*-, *p*-, *d*-, and *f*-states are also shown for the respective atoms. The vertical dashed lines in black indicate the Fermi energy.

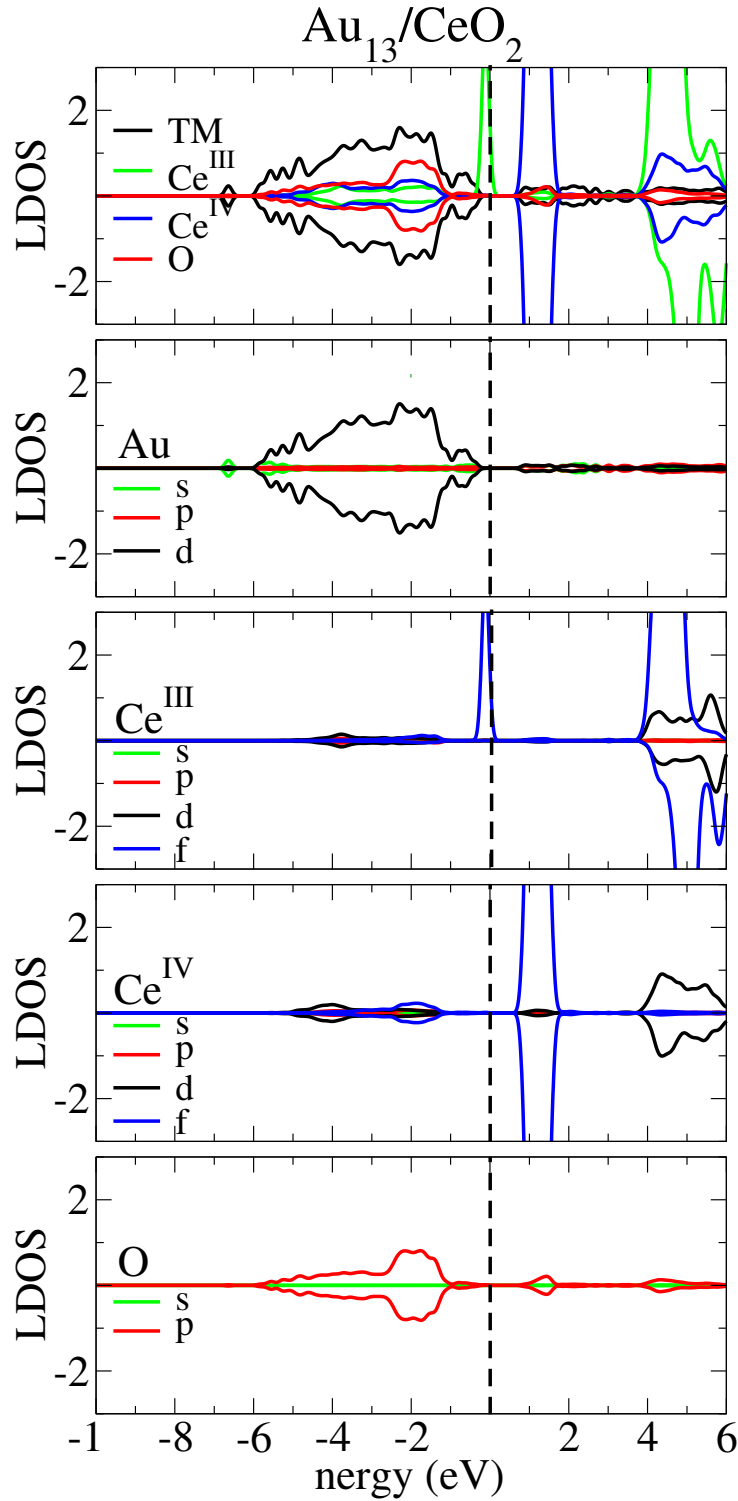

Figure 8: Atom resolved average local density of states (LDOS) of the Au,  $\text{Ce}^{\text{III}}$ ,  $\text{Ce}^{\text{IV}}$ , and O atoms in the  $\text{Au}_{13}/\text{CeO}_2(111)$  system in the lowest energy configuration. The Au LDOS is the average over all the Pt atoms in the 13-atom cluster, while the  $\text{Ce}^{\text{III}}$ ,  $\text{Ce}^{\text{IV}}$ , and O LDOS are the average over only the  $\text{Ce}^{\text{III}}$ ,  $\text{Ce}^{\text{IV}}$ , and O atoms in the topmost Ce and O layers in the  $\text{CeO}_2(111)$  surface. The decomposition of the LDOS into  $s$ -,  $p$ -,  $d$ -, and  $f$ -states are also shown for the respective atoms. The vertical dashed lines in black indicate the Fermi energy.
